# Supplementary material
Source: PubMed Central journal article supplement (PMC8655276)
Supplement: SUPPLEMENTARY_FILES.pdf [file SUPPLEMENTARY_FILES.pdf]

## SUPPLEMENTARY FILES

**Supplementary Table 1.** *Baseline characteristics*

| Characteristics                                           | Summary statistics | Total (n=139) | Group 1 (n=71) | Group 2 (n=68) | p-value |
|-----------------------------------------------------------|--------------------|---------------|----------------|----------------|---------|
| <b>Age (years)</b>                                        | N                  | 138 (99%)     | 70 (99%)       | 68 (100%)      | 0.993   |
|                                                           | Missing            | 1 (1%)        | 1 (1%)         | 0 (0%)         |         |
|                                                           | Median (IQR)       | 49 (39- 61)   | 48 (39- 60)    | 49 (38- 62)    |         |
|                                                           | Min-Max            | 13 - 83       | 20 - 79        | 13 - 83        |         |
| <b>Age at diabetes onset (years)</b>                      | N                  | 138 (99%)     | 70 (99%)       | 68 (100%)      | 0.905   |
|                                                           | Missing            | 1 (1%)        | 1 (1%)         | 0 (0%)         |         |
|                                                           | Median (IQR)       | 23 (12- 32)   | 23 (13- 32)    | 24 (12- 33)    |         |
|                                                           | Min-Max            | 1 - 61        | 3 - 50         | 1 - 61         |         |
| <b>Age at CSII first usage (years)</b>                    | N                  | 61 (44%)      | 32 (45%)       | 29 (43%)       | 0.988   |
|                                                           | Missing            | 78 (56%)      | 39 (55%)       | 39 (57%)       |         |
|                                                           | Median (IQR)       | 31 (23- 39)   | 31 (22- 38)    | 29 (23- 39)    |         |
|                                                           | Min-Max            | 0 - 58        | 9 - 58         | 0 - 57         |         |
| <b>Time between CSII start and last follow-up (years)</b> | N                  | 139 (100%)    | 71 (100%)      | 68 (100%)      | 0.019   |
|                                                           | Missing            | 0 (0%)        | 0 (0%)         | 0 (0%)         |         |
|                                                           | Median (IQR)       | 12 (8- 17)    | 14 (9- 18)     | 10 (6- 16)     |         |
|                                                           | Min-Max            | 0 - 35        | 2 - 35         | 0 - 28         |         |
| <b>Duration of PLGS use (years)</b>                       | N                  | 71 (51%)      | 71 (100%)      | 0 (0%)         |         |
|                                                           | Missing            | 68 (49%)      | 0 (0%)         | 68 (100%)      |         |
|                                                           | Mean $\pm$ SD      | 5 $\pm$ 1     | 5 $\pm$ 1      | . $\pm$ .      |         |
|                                                           | Median (IQR)       | 5 (4- 5)      | 5 (4- 5)       | . (.-.)        |         |
|                                                           | Min-Max            | 2 - 9         | 2 - 9          | . -. .         |         |

**Supplementary Table 2.** Annual glucose control measures Group 1

| Parameter | Summary statistics | FU #1         | FU #2         | FU #3         | FU #4         | FU #5         | p-value |
|-----------|--------------------|---------------|---------------|---------------|---------------|---------------|---------|
| HbA1c (%) | N                  | 69 (98.6%)    | 64 (97.0%)    | 52 (100.0%)   | 55 (100.0%)   | 34 (89.5%)    | 0.020   |
|           | Missing            | 1 (1.4%)      | 2 (3.0%)      | 0 (0.0%)      | 0 (0.0%)      | 4 (10.5%)     |         |
|           | Median (IQR)       | 7.3 (6.8-8.0) | 7.2 (6.8-7.7) | 7.3 (6.8-7.8) | 7.0 (6.6-7.5) | 6.8 (6.3-7.8) |         |
|           | Min-Max            | 6.0 -13.0     | 5.3 -9.5      | 5.2 -9.3      | 5.2 -9.0      | 5.0 -9.8      |         |

**Supplementary Table 3.** Annual glucose control measures Group 2

| Parameter | Summary statistics | FU #1         | FU #2         | FU #3         | FU #4         | FU #5         | p-value |
|-----------|--------------------|---------------|---------------|---------------|---------------|---------------|---------|
| HbA1c (%) | N                  | 67 (100.0%)   | 58 (100.0%)   | 39 (92.9%)    | 37 (94.9%)    | 18 (90.0%)    | 0.853   |
|           | Missing            | 0 (0.0%)      | 0 (0.0%)      | 3 (7.1%)      | 2 (5.1%)      | 2 (10.0%)     |         |
|           | Median (IQR)       | 7.4 (6.7-8.0) | 7.6 (6.9-8.1) | 7.2 (6.5-8.0) | 7.4 (6.9-8.0) | 7.4 (6.7-8.0) |         |
|           | Min-Max            | 5.2 -11.3     | 4.6 -11.3     | 5.0 -10.0     | 5.5 -10.7     | 5.4 -8.8      |         |

**Supplementary Table 4.** *Clinical outcomes and device utilization Group 1*

| Parameter                                     | Summary statistics | FU #1             | FU #2             | FU #3             | FU #4             | FU #5             | p-value |
|-----------------------------------------------|--------------------|-------------------|-------------------|-------------------|-------------------|-------------------|---------|
| <b>CHO counting</b>                           | %, n/Pts           | 69.1% (47/68)     | 65.6% (40/61)     | 75.0% (33/44)     | 80.0% (44/55)     | 90.9% (30/33)     | 0.422   |
| <b>Special bolus</b>                          | %, n/Pts           | 86.8% (59/68)     | 83.6% (51/61)     | 95.5% (42/44)     | 87.3% (48/55)     | 97.0% (32/33)     | 0.250   |
| <b>Use of "temporary basal rate" function</b> | %, n/Pts           | 58.8% (40/68)     | 72.1% (44/61)     | 79.5% (35/44)     | 58.2% (32/55)     | 93.9% (31/33)     | 0.589   |
| <b>LGS</b>                                    | %, n/Pts           | 45.7% (32/70)     | 0.0% (0/66)       | 0.0% (0/52)       | 0.0% (0/55)       | 0.0% (0/0)        | 0.589   |
| <b>Microalbuminuria (mg/dl)</b>               | N                  | 15 (21.4%)        | 39 (59.1%)        | 31 (59.6%)        | 51 (92.7%)        | 25 (65.8%)        | 0.306   |
|                                               | Missing            | 55 (78.6%)        | 27 (40.9%)        | 21 (40.4%)        | 4 (7.3%)          | 13 (34.2%)        |         |
|                                               | Mean ± SD          | 10.1 ± 12.7       | 6.7 ± 17.8        | 5.4 ± 21.6        | 2.6 ± 5.9         | 8.0 ± 23.8        |         |
|                                               | Median (IQR)       | 5.0 (0.5- 13.8)   | 1.4 (0.3- 6.0)    | 0.5 (0.2- 1.5)    | 0.0 (0.0- 2.0)    | 0.0 (0.0- 2.0)    |         |
|                                               | Min-Max            | 0.0 - 40.0        | 0.0 - 100.0       | 0.0 - 121.0       | 0.0 - 30.0        | 0.0 - 111.0       |         |
| <b>Dyslipidemia</b>                           | %, n/Pts           | 29.3% (17/58)     | 29.5% (18/61)     | 33.3% (16/48)     | 30.6% (17/54)     | 32.5% (11/33)     | 0.122   |
| <b>Arterial hypertension</b>                  | %, n/Pts           | 31.0% (18/58)     | 32.8% (20/61)     | 31.3% (15/48)     | 40.7% (22/54)     | 45.5% (15/33)     | 0.179   |
| <b>Peripheral artery disease</b>              | %, n/Pts           | 20.7% (12/58)     | 26.2% (16/61)     | 25.0% (12/48)     | 24.1% (13/54)     | 21.2% (7/33)      | 0.690   |
| <b>BMI (kg/m2)</b>                            | N                  | 38 (54.3%)        | 52 (78.8%)        | 49 (94.2%)        | 45 (81.8%)        | 32 (84.2%)        | 0.887   |
|                                               | Missing            | 32 (45.7%)        | 14 (21.2%)        | 3 (5.8%)          | 10 (18.2%)        | 6 (15.8%)         |         |
|                                               | Mean ± SD          | 25.2 ± 3.5        | 25.2 ± 3.7        | 25.6 ± 3.5        | 25.2 ± 3.7        | 25.2 ± 2.8        |         |
|                                               | Median (IQR)       | 25.7 (23.0- 27.5) | 25.1 (22.5- 27.3) | 25.2 (23.7- 27.3) | 25.0 (23.2- 27.0) | 26.0 (23.6- 27.0) |         |
|                                               | Min-Max            | 17.7 - 32.8       | 17.8 - 34.3       | 18.0 - 34.4       | 18.0 - 34.8       | 20.0 - 32.7       |         |

**Supplementary Table 5. Clinical outcomes and device utilization Group 2**

| Parameter                                     | Summary statistics | FU #1             | FU #2             | FU #3             | FU #4             | FU #5             | p-value |
|-----------------------------------------------|--------------------|-------------------|-------------------|-------------------|-------------------|-------------------|---------|
| <b>CHO counting</b>                           | %, n/Pts           | 52.2% (35/67)     | 46.3% (25/54)     | 57.6% (19/33)     | 63.2% (24/38)     | 58.8% (10/17)     | 0.331   |
| <b>Special bolus</b>                          | %, n/Pts           | 85.1% (57/67)     | 72.2% (39/54)     | 90.9% (30/33)     | 89.5% (34/38)     | 94.1% (16/17)     | 0.024   |
| <b>Use of "temporary basal rate" function</b> | %, n/Pts           | 47.8% (32/67)     | 57.4% (31/54)     | 84.8% (28/33)     | 65.8% (25/38)     | 70.6% (12/17)     | 0.422   |
| <b>LGS</b>                                    | %, n/Pts           | 32.8% (22/67)     | 3.4% (2/58)       | 0.0% (0/42)       | 0.0% (0/39)       | 0.0% (0/0)        |         |
| <b>Microalbuminuria (mg/dl)</b>               | N                  | 17 (25.4%)        | 43 (74.1%)        | 30 (71.4%)        | 34 (87.2%)        | 15 (75.0%)        | 0.296   |
|                                               | Missing            | 50 (74.6%)        | 15 (25.9%)        | 12 (28.6%)        | 5 (12.8%)         | 5 (25.0%)         |         |
|                                               | Mean ± SD          | 5.4 ± 12.9        | 6.1 ± 15.7        | 2.7 ± 4.8         | 2.7 ± 6.1         | 3.5 ± 6.3         |         |
|                                               | Median (IQR)       | 0.0 (0.0- 1.0)    | 0.5 (0.0- 3.0)    | 0.5 (0.0- 3.0)    | 0.0 (0.0- 0.6)    | 1.3 (0.0- 2.0)    |         |
|                                               | Min-Max            | 0.0 - 46.0        | 0.0 - 89.4        | 0.0 - 20.0        | 0.0 - 30.0        | 0.0 - 20.9        |         |
| <b>Dyslipidemia</b>                           | %, n/Pts           | 21.2% (11/52)     | 19.6% (10/51)     | 31.6% (12/38)     | 34.2% (13/38)     | 44.4% (8/18)      | 0.422   |
| <b>Arterial hypertension</b>                  | %, n/Pts           | 25.0% (13/52)     | 27.5% (14/51)     | 36.8% (14/38)     | 42.1% (16/38)     | 38.9% (7/18)      | 0.422   |
| <b>Peripheral artery disease</b>              | %, n/Pts           | 13.5% (7/52)      | 13.7% (7/51)      | 18.4% (7/38)      | 36.8% (14/38)     | 27.8% (5/18)      | 0.422   |
| <b>BMI (kg/m2)</b>                            | N                  | 40 (59.7%)        | 41 (70.7%)        | 40 (95.2%)        | 32 (82.1%)        | 19 (95.0%)        | 0.001   |
|                                               | Missing            | 27 (40.3%)        | 17 (29.3%)        | 2 (4.8%)          | 7 (17.9%)         | 1 (5.0%)          |         |
|                                               | Mean ± SD          | 25.3 ± 2.8        | 25.5 ± 2.9        | 25.9 ± 3.1        | 25.5 ± 3.5        | 25.7 ± 3.4        |         |
|                                               | Median (IQR)       | 25.0 (23.1- 27.3) | 25.3 (23.4- 26.9) | 26.2 (23.7- 27.5) | 25.9 (23.1- 26.9) | 26.0 (23.6- 27.0) |         |
|                                               | Min-Max            | 20.2 - 32.0       | 20.7 - 32.5       | 18.0 - 32.5       | 18.5 - 32.0       | 17.7 - 32.0       |         |
